# Supplementary material for: General Labor Well-Being in Latin American Dentists during the COVID-19 Pandemic
Source: MDPI journal article supplement (doi:10.3390/ijerph19106317), 2022-05-23
Supplement: s1 [file s1]

**Table S1.** Scales and items of the Questionnaire of General Labor Well-Being (qBLG)\*

| <b>Factor: Psychosocial Well-Being</b>                |                 |   |   |   |   |   |   |   |              |
|-------------------------------------------------------|-----------------|---|---|---|---|---|---|---|--------------|
| <b>Emotions Scale</b>                                 |                 |   |   |   |   |   |   |   |              |
| <b>Currently at my job I feel:</b>                    |                 |   |   |   |   |   |   |   |              |
|                                                       | Dissatisfaction | 1 | 2 | 3 | 4 | 5 | 6 | 7 | Satisfaction |
|                                                       | Insecurity      | 1 | 2 | 3 | 4 | 5 | 6 | 7 | Security     |
|                                                       | Restlessness    | 1 | 2 | 3 | 4 | 5 | 6 | 7 | Tranquility  |
|                                                       | Impotence       | 1 | 2 | 3 | 4 | 5 | 6 | 7 | Potency      |
|                                                       | Discomfort      | 1 | 2 | 3 | 4 | 5 | 6 | 7 | Well-being   |
|                                                       | Distrust        | 1 | 2 | 3 | 4 | 5 | 6 | 7 | Trust        |
|                                                       | Uncertainty     | 1 | 2 | 3 | 4 | 5 | 6 | 7 | Certainty    |
|                                                       | Confusion       | 1 | 2 | 3 | 4 | 5 | 6 | 7 | Clarity      |
|                                                       | Hopelessness    | 1 | 2 | 3 | 4 | 5 | 6 | 7 | Hope         |
|                                                       | Difficulty      | 1 | 2 | 3 | 4 | 5 | 6 | 7 | Facility     |
| <b>Skills Scale</b>                                   |                 |   |   |   |   |   |   |   |              |
| <b>Currently at my job I feel:</b>                    |                 |   |   |   |   |   |   |   |              |
|                                                       | Insensitivity   | 1 | 2 | 3 | 4 | 5 | 6 | 7 | Sensitivity  |
|                                                       | Irrationality   | 1 | 2 | 3 | 4 | 5 | 6 | 7 | Rationality  |
|                                                       | Incompetence    | 1 | 2 | 3 | 4 | 5 | 6 | 7 | Competence   |
|                                                       | Immorality      | 1 | 2 | 3 | 4 | 5 | 6 | 7 | Morality     |
|                                                       | Badness         | 1 | 2 | 3 | 4 | 5 | 6 | 7 | Goodness     |
|                                                       | Failure         | 1 | 2 | 3 | 4 | 5 | 6 | 7 | Success      |
|                                                       | Incapacity      | 1 | 2 | 3 | 4 | 5 | 6 | 7 | Capacity     |
|                                                       | Pessimism       | 1 | 2 | 3 | 4 | 5 | 6 | 7 | Optimism     |
|                                                       | Inefficacy      | 1 | 2 | 3 | 4 | 5 | 6 | 7 | Efficacy     |
|                                                       | Uselessness     | 1 | 2 | 3 | 4 | 5 | 6 | 7 | Usefulness   |
| <b>Expectations Scale</b>                             |                 |   |   |   |   |   |   |   |              |
| <b>In my career:</b>                                  |                 |   |   |   |   |   |   |   |              |
| My motivation for working                             | Going down      | 1 | 2 | 3 | 4 | 5 | 6 | 7 | Going up     |
| My identification with the values of the organization | Going down      | 1 | 2 | 3 | 4 | 5 | 6 | 7 | Going up     |
| My professional performance                           | Going down      | 1 | 2 | 3 | 4 | 5 | 6 | 7 | Going up     |
| My ability to manage my workload                      | Going down      | 1 | 2 | 3 | 4 | 5 | 6 | 7 | Going up     |
| The quality of my working conditions                  | Going down      | 1 | 2 | 3 | 4 | 5 | 6 | 7 | Going up     |
| My professional self-esteem                           | Going down      | 1 | 2 | 3 | 4 | 5 | 6 | 7 | Going up     |
| The cordiality in my work environment                 | Going down      | 1 | 2 | 3 | 4 | 5 | 6 | 7 | Going up     |
| Reconciling my work with my private life              | Going down      | 1 | 2 | 3 | 4 | 5 | 6 | 7 | Going up     |
| My confidence in my professional future               | Going down      | 1 | 2 | 3 | 4 | 5 | 6 | 7 | Going up     |
| My quality of life at work                            | Going down      | 1 | 2 | 3 | 4 | 5 | 6 | 7 | Going up     |
| The meaning of my work                                | Going down      | 1 | 2 | 3 | 4 | 5 | 6 | 7 | Going up     |
| My compliance with management guidelines              | Going down      | 1 | 2 | 3 | 4 | 5 | 6 | 7 | Going up     |
| My mood at work                                       | Going down      | 1 | 2 | 3 | 4 | 5 | 6 | 7 | Going up     |
| My career advancement opportunities                   | Going down      | 1 | 2 | 3 | 4 | 5 | 6 | 7 | Going up     |
| My sense of security at work                          | Going down      | 1 | 2 | 3 | 4 | 5 | 6 | 7 | Going up     |
| My participation in the decisions of the organization | Going down      | 1 | 2 | 3 | 4 | 5 | 6 | 7 | Going up     |
| My job satisfaction                                   | Going down      | 1 | 2 | 3 | 4 | 5 | 6 | 7 | Going up     |
| My professional fulfillment                           | Going down      | 1 | 2 | 3 | 4 | 5 | 6 | 7 | Going up     |
| The level of excellence in my organization            | Going down      | 1 | 2 | 3 | 4 | 5 | 6 | 7 | Going up     |
| My professional effectiveness                         | Going down      | 1 | 2 | 3 | 4 | 5 | 6 | 7 | Going up     |

|                                               |            |   |   |   |   |   |   |   |          |
|-----------------------------------------------|------------|---|---|---|---|---|---|---|----------|
| My commitment at work                         | Going down | 1 | 2 | 3 | 4 | 5 | 6 | 7 | Going up |
| My professional skills                        | Going down | 1 | 2 | 3 | 4 | 5 | 6 | 7 | Going up |
| <b>Factor: Collateral Effects</b>             |            |   |   |   |   |   |   |   |          |
| <b>Somatization Scale</b>                     |            |   |   |   |   |   |   |   |          |
| <b>Currently, because of my work, I feel:</b> |            |   |   |   |   |   |   |   |          |
| Digestive disorders                           | Never      | 1 | 2 | 3 | 4 | 5 | 6 | 7 | Always   |
| Headache                                      | Never      | 1 | 2 | 3 | 4 | 5 | 6 | 7 | Always   |
| Insomnia                                      | Never      | 1 | 2 | 3 | 4 | 5 | 6 | 7 | Always   |
| Backache                                      | Never      | 1 | 2 | 3 | 4 | 5 | 6 | 7 | Always   |
| Muscle tensions                               | Never      | 1 | 2 | 3 | 4 | 5 | 6 | 7 | Always   |
| <b>Wear Scale</b>                             |            |   |   |   |   |   |   |   |          |
| <b>Currently, because of my work, I feel:</b> |            |   |   |   |   |   |   |   |          |
| Work overload                                 | Never      | 1 | 2 | 3 | 4 | 5 | 6 | 7 | Always   |
| Emotional stress                              | Never      | 1 | 2 | 3 | 4 | 5 | 6 | 7 | Always   |
| Physical exhaustion                           | Never      | 1 | 2 | 3 | 4 | 5 | 6 | 7 | Always   |
| Mental saturation                             | Never      | 1 | 2 | 3 | 4 | 5 | 6 | 7 | Always   |
| <b>Alienation Scale</b>                       |            |   |   |   |   |   |   |   |          |
| <b>Currently, because of my work, I feel:</b> |            |   |   |   |   |   |   |   |          |
| Bad mood                                      | Never      | 1 | 2 | 3 | 4 | 5 | 6 | 7 | Always   |
| Low professional achievement                  | Never      | 1 | 2 | 3 | 4 | 5 | 6 | 7 | Always   |
| Depersonalized treatment                      | Never      | 1 | 2 | 3 | 4 | 5 | 6 | 7 | Always   |
| Frustration                                   | Never      | 1 | 2 | 3 | 4 | 5 | 6 | 7 | Always   |

\* The original qBLG was validated in Spanish. The factors and scales were translated from Spanish to English for didactic purposes. Content/Construct validation is recommended for research outside Spanish of Latin American contexts.

**Table S2.** Multiple pairwise comparisons for the origin country of participants and the scores of psychosocial well-being

| Sample 1-Sample 2    | Pairwise comparisons by origin country: Psychosocial well-being* |            |                     |      |           |
|----------------------|------------------------------------------------------------------|------------|---------------------|------|-----------|
|                      | Test statistic                                                   | Std. Error | Std. Test statistic | Sig. | Adj. Sig. |
| Paraguay-Argentina   | 64.838                                                           | 63.063     | 1.028               | .304 | 1.000     |
| Paraguay-Venezuela   | 80.514                                                           | 60.972     | 1.321               | .187 | 1.000     |
| Paraguay-Uruguay     | 104.088                                                          | 88.969     | 1.170               | .242 | 1.000     |
| Paraguay-Colombia    | 164.192                                                          | 57.083     | 2.876               | .004 | .221      |
| Paraguay-Chile       | 191.542                                                          | 67.084     | 2.855               | .004 | .237      |
| Paraguay-Peru        | 222.704                                                          | 58.206     | 3.826               | .000 | .007      |
| Paraguay-Ecuador     | 325.851                                                          | 57.400     | 5.677               | .000 | .000      |
| Paraguay-Costa Rica  | -352.298                                                         | 100.827    | -3.494              | .000 | .026      |
| Paraguay-Nicaragua   | -371.900                                                         | 66.526     | -5.590              | .000 | .000      |
| Paraguay-México      | 390.120                                                          | 64.732     | 6.027               | .000 | .000      |
| Argentina-Venezuela  | -15.676                                                          | 60.892     | -.257               | .797 | 1.000     |
| Argentina-Uruguay    | -39.250                                                          | 88.915     | -.441               | .659 | 1.000     |
| Argentina-Colombia   | 99.354                                                           | 56.998     | 1.743               | .081 | 1.000     |
| Argentina-Chile      | 126.704                                                          | 67.012     | 1.891               | .059 | 1.000     |
| Argentina-Peru       | 157.866                                                          | 58.123     | 2.716               | .007 | .363      |
| Argentina-Ecuador    | -261.013                                                         | 57.315     | -4.554              | .000 | .000      |
| Argentina-Costa Rica | -287.460                                                         | 100.779    | -2.852              | .004 | .239      |
| Argentina-Nicaragua  | -307.063                                                         | 66.453     | -4.621              | .000 | .000      |
| Argentina-Mexico     | 325.282                                                          | 64.658     | 5.031               | .000 | .000      |
| Venezuela-Uruguay    | 23.574                                                           | 87.444     | .270                | .787 | 1.000     |
| Venezuela-Colombia   | 83.678                                                           | 54.675     | 1.530               | .126 | 1.000     |
| Venezuela-Chile      | 111.028                                                          | 65.047     | 1.707               | .088 | 1.000     |
| Venezuela-Peru       | 142.190                                                          | 55.847     | 2.546               | .011 | .599      |
| Venezuela-Ecuador    | 245.337                                                          | 55.005     | 4.460               | .000 | .000      |
| Venezuela-Costa Rica | -271.784                                                         | 99.483     | -2.732              | .006 | .346      |
| Venezuela-Nicaragua  | -291.386                                                         | 64.471     | -4.520              | .000 | .000      |
| Venezuela-Mexico     | 309.606                                                          | 62.619     | 4.944               | .000 | .000      |
| Uruguay-Colombia     | 60.104                                                           | 84.778     | .709                | .478 | 1.000     |
| Uruguay-Chile        | 87.454                                                           | 91.811     | .953                | .341 | 1.000     |
| Uruguay-Peru         | 118.616                                                          | 85.539     | 1.387               | .166 | 1.000     |
| Uruguay-Ecuador      | 221.763                                                          | 84.992     | 2.609               | .009 | .499      |
| Uruguay-Costa Rica   | -248.210                                                         | 118.722    | -2.091              | .037 | 1.000     |
| Uruguay-Nicaragua    | -267.813                                                         | 91.403     | -2.930              | .003 | .186      |
| Uruguay-Mexico       | 286.032                                                          | 90.106     | 3.174               | .002 | .083      |
| Colombia-Chile       | 27.350                                                           | 61.417     | .445                | .656 | 1.000     |
| Colombia-Peru        | 58.512                                                           | 51.573     | 1.135               | .257 | 1.000     |
| Colombia-Ecuador     | -161.659                                                         | 50.661     | -3.191              | .001 | .078      |
| Colombia-Costa Rica  | -188.106                                                         | 97.148     | -1.936              | .053 | 1.000     |
| Colombia-Nicaragua   | -207.709                                                         | 60.807     | -3.416              | .001 | .035      |

| Pairwise comparisons by origin country: Psychosocial well-being* |                |            |                     |      |           |
|------------------------------------------------------------------|----------------|------------|---------------------|------|-----------|
| Sample 1-Sample 2                                                | Test statistic | Std. Error | Std. Test statistic | Sig. | Adj. Sig. |
| Colombia-Mexico                                                  | 225.929        | 58.839     | 3.840               | .000 | .007      |
| Chile-Peru                                                       | 31.162         | 62.463     | .499                | .618 | 1.000     |
| Chile-Ecuador                                                    | -134.309       | 61.712     | -2.176              | .030 | 1.000     |
| Chile-Costa Rica                                                 | -160.756       | 103.342    | -1.556              | .120 | 1.000     |
| Chile-Nicaragua                                                  | -180.359       | 70.280     | -2.566              | .010 | .565      |
| Chile-Mexico                                                     | -198.578       | 68.585     | -2.895              | .004 | .208      |
| Peru-Ecuador                                                     | -103.147       | 51.923     | -1.987              | .047 | 1.000     |
| Peru-Costa Rica                                                  | -129.594       | 97.813     | -1.325              | .185 | 1.000     |
| Peru-Nicaragua                                                   | -149.196       | 61.863     | -2.412              | .016 | .873      |
| Peru-Mexico                                                      | -167.416       | 59.930     | -2.794              | .005 | .287      |
| Ecuador-Costa Rica                                               | -26.447        | 97.335     | -.272               | .786 | 1.000     |
| Ecuador-Nicaragua                                                | -46.050        | 61.104     | -.754               | .451 | 1.000     |
| Ecuador-Mexico                                                   | 64.270         | 59.147     | 1.087               | .277 | 1.000     |
| Costa Rica-Nicaragua                                             | 19.603         | 102.981    | .190                | .849 | 1.000     |
| Costa Rica-Mexico                                                | 37.822         | 101.831    | .371                | .710 | 1.000     |
| Nicaragua-Mexico                                                 | 18.220         | 68.039     | .268                | .789 | 1.000     |

\* Significance values were adjusted using the Bonferroni correction for various tests.

**Figure S1.** Multiple pairwise comparisons for the origin country of participants and the scores of psychosocial well-being\*

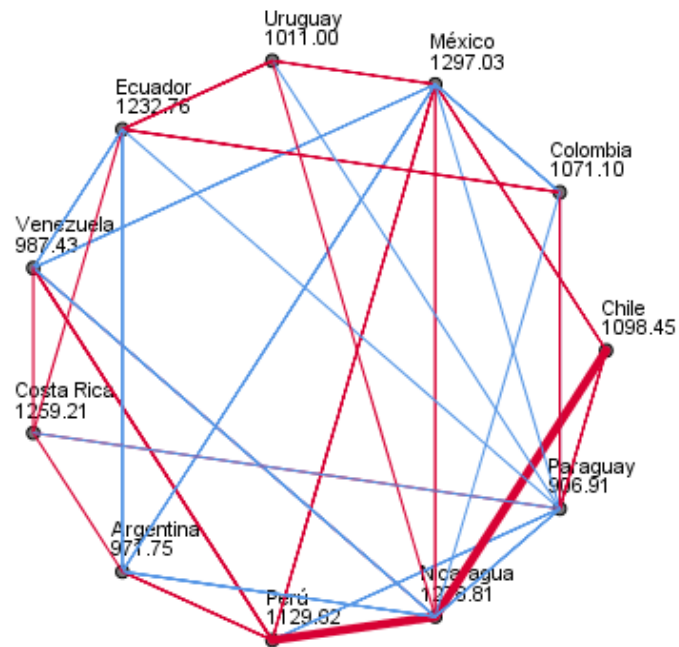

\* Each node represents the rank mean of the sample from the country of origin  
The blue lines represent the statistically significant differences between pairs of countries.

**Table S3.** Multiple pairwise comparisons for the origin country of participants and the scores of collateral effects.

| Sample 1-Sample 2    | Pairwise comparisons by origin country: Collateral effects* |            |                     |      |           |
|----------------------|-------------------------------------------------------------|------------|---------------------|------|-----------|
|                      | Test statistic                                              | Std. Error | Std. Test statistic | Sig. | Adj. Sig. |
| Venezuela-Nicaragua  | -23.022                                                     | 64.466     | -.357               | .721 | 1.000     |
| Venezuela-Peru       | 67.891                                                      | 55.842     | 1.216               | .224 | 1.000     |
| Venezuela-Colombia   | 139.197                                                     | 54.671     | 2.546               | .011 | .599      |
| Venezuela-Mexico     | 171.850                                                     | 62.614     | 2.745               | .006 | .333      |
| Venezuela-Costa Rica | -199.199                                                    | 99.476     | -2.002              | .045 | 1.000     |
| Venezuela-Ecuador    | 226.060                                                     | 55.001     | 4.110               | .000 | .002      |
| Venezuela-Uruguay    | 263.990                                                     | 87.437     | 3.019               | .003 | .139      |
| Venezuela-Paraguay   | -285.210                                                    | 60.967     | -4.678              | .000 | .000      |
| Venezuela-Chile      | 324.289                                                     | 65.042     | 4.986               | .000 | .000      |
| Venezuela-Argentina  | 417.999                                                     | 60.888     | 6.865               | .000 | .000      |
| Nicaragua-Peru       | 44.869                                                      | 61.858     | .725                | .468 | 1.000     |
| Nicaragua-Colombia   | 116.175                                                     | 60.802     | 1.911               | .056 | 1.000     |
| Nicaragua-Mexico     | 148.828                                                     | 68.034     | 2.188               | .029 | 1.000     |
| Nicaragua-Costa Rica | -176.177                                                    | 102.973    | -1.711              | .087 | 1.000     |
| Nicaragua-Ecuador    | 203.038                                                     | 61.100     | 3.323               | .001 | .049      |
| Nicaragua-Uruguay    | 240.967                                                     | 91.397     | 2.637               | .008 | .461      |
| Nicaragua-Paraguay   | 262.187                                                     | 66.521     | 3.941               | .000 | .004      |
| Nicaragua-Chile      | 301.266                                                     | 70.275     | 4.287               | .000 | .001      |
| Nicaragua-Argentina  | 394.977                                                     | 66.448     | 5.944               | .000 | .000      |
| Peru-Colombia        | -71.306                                                     | 51.569     | -1.383              | .167 | 1.000     |
| Peru-Mexico          | -103.959                                                    | 59.926     | -1.735              | .083 | 1.000     |
| Peru-Costa Rica      | -131.308                                                    | 97.805     | -1.343              | .179 | 1.000     |
| Peru-Ecuador         | -158.169                                                    | 51.919     | -3.046              | .002 | .127      |
| Peru-Uruguay         | -196.099                                                    | 85.532     | -2.293              | .022 | 1.000     |
| Peru-Paraguay        | -217.319                                                    | 58.202     | -3.734              | .000 | .010      |
| Peru-Chile           | -256.397                                                    | 62.458     | -4.105              | .000 | .002      |
| Peru-Argentina       | -350.108                                                    | 58.119     | -6.024              | .000 | .000      |
| Colombia-Mexico      | 32.653                                                      | 58.835     | .555                | .579 | 1.000     |
| Colombia-Costa Rica  | -60.001                                                     | 97.141     | -.618               | .537 | 1.000     |
| Colombia-Ecuador     | -86.863                                                     | 50.657     | -1.715              | .086 | 1.000     |
| Colombia-Uruguay     | -124.792                                                    | 84.772     | -1.472              | .141 | 1.000     |
| Colombia-Paraguay    | -146.012                                                    | 57.079     | -2.558              | .011 | .579      |
| Colombia-Chile       | 185.091                                                     | 61.413     | 3.014               | .003 | .142      |
| Colombia-Argentina   | -278.802                                                    | 56.994     | -4.892              | .000 | .000      |
| Mexico-Costa Rica    | -27.349                                                     | 101.824    | -.269               | .788 | 1.000     |
| Mexico-Ecuador       | -54.210                                                     | 59.142     | -.917               | .359 | 1.000     |
| Mexico-Uruguay       | -92.139                                                     | 90.100     | -1.023              | .306 | 1.000     |
| Mexico-Paraguay      | -113.359                                                    | 64.728     | -1.751              | .080 | 1.000     |
| Mexico-Chile         | 152.438                                                     | 68.580     | 2.223               | .026 | 1.000     |
| Mexico-Argentina     | -246.149                                                    | 64.653     | -3.807              | .000 | .008      |
| Costa Rica-Ecuador   | 26.861                                                      | 97.327     | .276                | .783 | 1.000     |
| Costa Rica-Uruguay   | 64.791                                                      | 118.713    | .546                | .585 | 1.000     |
| Costa Rica-Paraguay  | 86.011                                                      | 100.819    | .853                | .394 | 1.000     |
| Costa Rica-Chile     | 125.090                                                     | 103.335    | 1.211               | .226 | 1.000     |

| Sample 1-Sample 2    | Pairwise comparisons by origin country: Collateral effects* |            |                     |      |           |
|----------------------|-------------------------------------------------------------|------------|---------------------|------|-----------|
|                      | Test statistic                                              | Std. Error | Std. Test statistic | Sig. | Adj. Sig. |
| Costa Rica-Argentina | 218.801                                                     | 100.771    | 2.171               | .030 | 1.000     |
| Ecuador-Uruguay      | -37.930                                                     | 84.985     | -.446               | .655 | 1.000     |
| Ecuador-Paraguay     | -59.150                                                     | 57.395     | -1.031              | .303 | 1.000     |
| Ecuador-Chile        | 98.229                                                      | 61.707     | 1.592               | .111 | 1.000     |
| Ecuador-Argentina    | 191.940                                                     | 57.311     | 3.349               | .001 | .045      |
| Uruguay-Paraguay     | -21.220                                                     | 88.963     | -.239               | .811 | 1.000     |
| Uruguay-Chile        | 60.299                                                      | 91.804     | .657                | .511 | 1.000     |
| Uruguay-Argentina    | 154.010                                                     | 88.908     | 1.732               | .083 | 1.000     |
| Paraguay-Chile       | 39.079                                                      | 67.079     | .583                | .560 | 1.000     |
| Paraguay-Argentina   | 132.790                                                     | 63.059     | 2.106               | .035 | 1.000     |
| Chile-Argentina      | -93.711                                                     | 67.007     | -1.399              | .162 | 1.000     |

\* Significance values were adjusted using the Bonferroni correction for various tests.

**Figure S2.** Multiple pairwise comparisons for the origin country of participants and the scores of collateral effects.\*

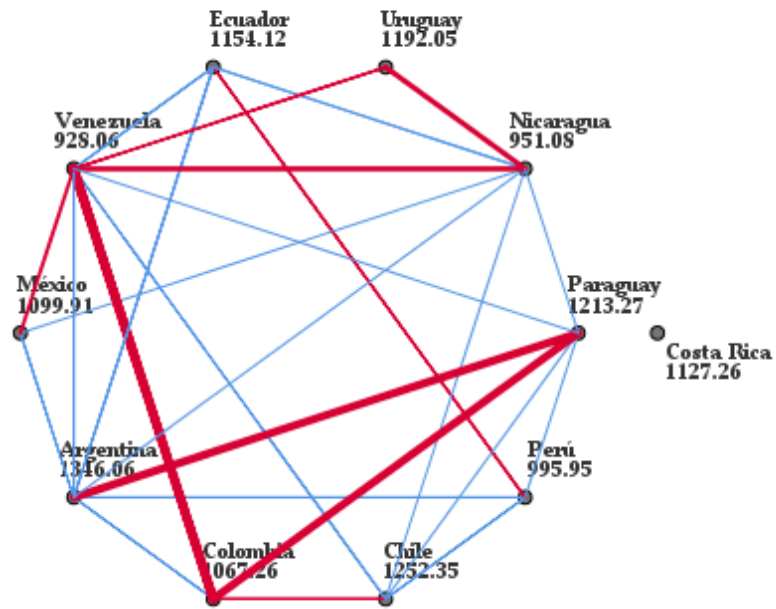

\* Each node represents the rank mean of the sample from the country of origin  
The blue lines represent the statistically significant differences between pairs of countries.
